# Supplementary material for: Wnt antagonist FRZB is a muscle biomarker of denervation atrophy in amyotrophic lateral sclerosis
Source: PubMed Central journal article supplement (PMC7541525; doi:10.1038/s41598-020-73845-z), 2020-10-07
Supplement: 41598_2020_73845_MOESM1_ESM.pdf [file 41598_2020_73845_MOESM1_ESM.pdf]

## Supplemental Figures

Wnt antagonist FRZB is a muscle biomarker of denervation atrophy  
in amyotrophic lateral sclerosis

Thaddaeus Kwan, PhD, Mohamed Kazamel, MD, Kristina Thoenes, Ying Si, PhD, Nan  
Jiang, MD, PhD, Peter H. King, MD

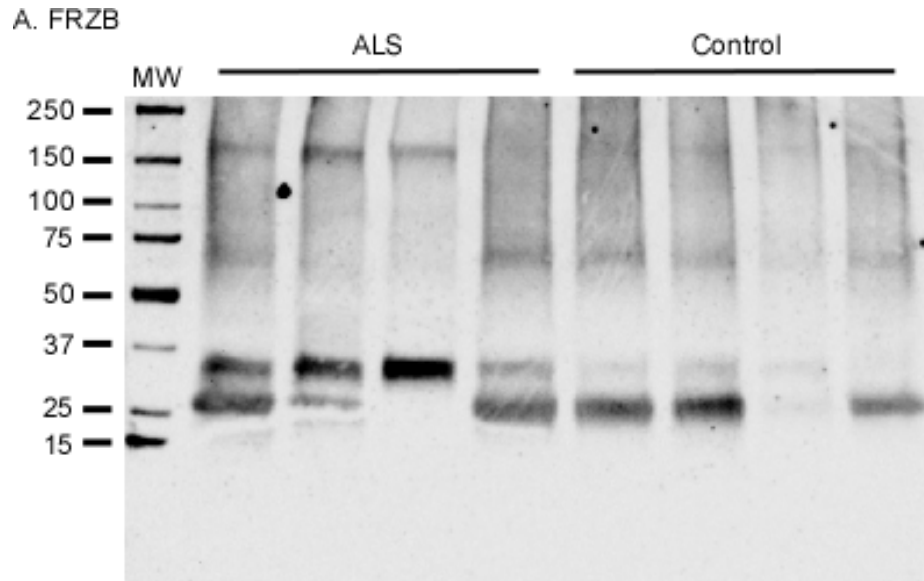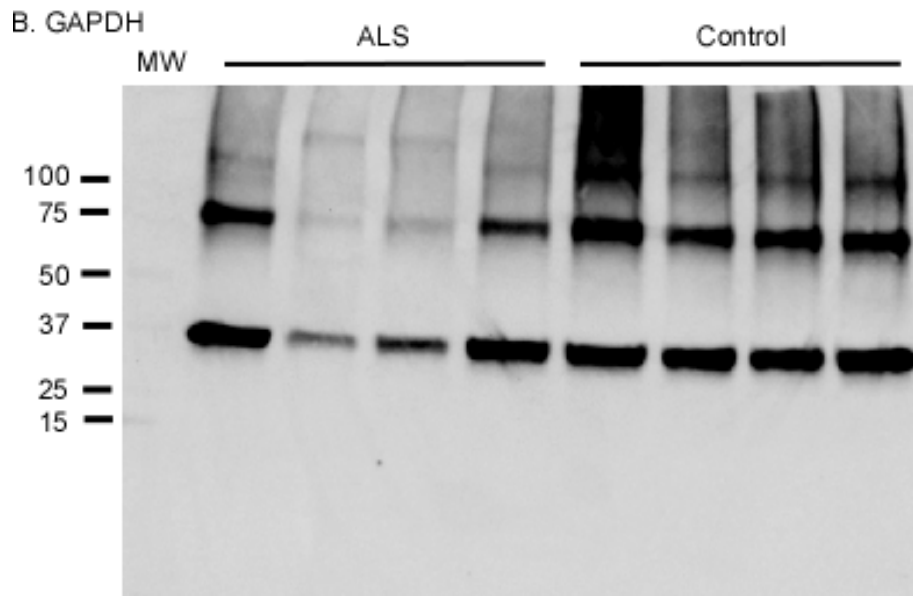

**Supplemental Figure 1: Uncropped western blots for FRZB and GAPDH immunodetection shown in Fig. 1C.**

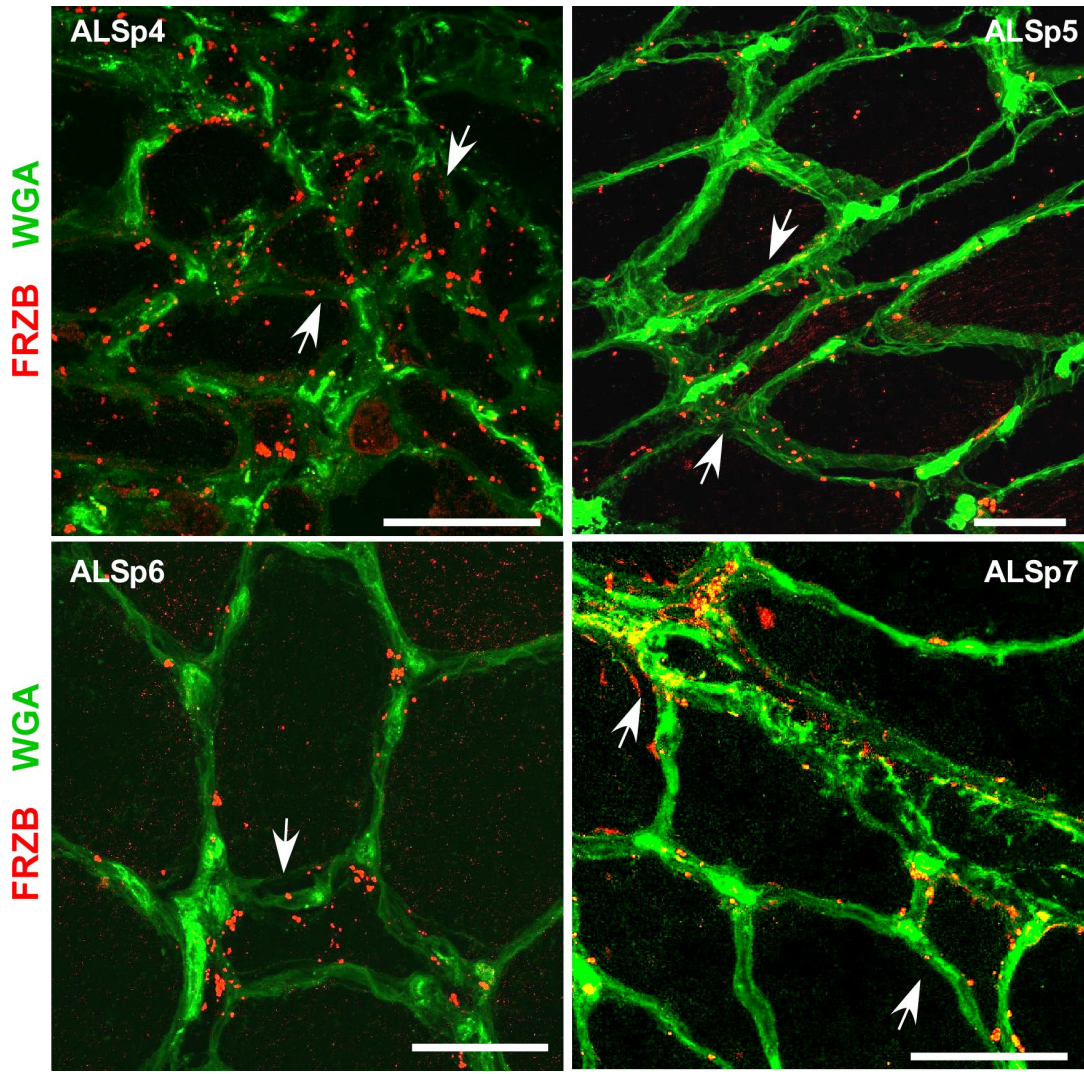

**Supplemental Figure 2: FRZB is increased in areas of myofiber atrophy in ALS muscle samples.** Muscle sections from four additional ALS patients were immunostained with FRZB antibody and the lectin, WGA. ALSp4 shows intense staining in a region of grouped atrophy (arrows). ALSp5-7 sections show increased immunoreactivity surrounding atrophic myofibers (arrows). Scale bars, 50  $\mu$ M.
